Viral-mediated transgenesis of MAOA and AVP increases territorial aggression in stickleback

Noelle James<sup>1,2</sup> and Alison Bell<sup>1,2,3,4</sup>

<sup>1</sup> Neuroscience Program, University of Illinois at Urbana-Champaign

<sup>2</sup> Department of Evolution, Ecology and Behavior, University of Illinois at Urbana-Champaign

<sup>3</sup> Carl R. Woese Institute for Genomic Biology, University of Illinois at Urbana-Champaign

<sup>4</sup> Program in Ecology, Evolution and Conservation Biology, University of Illinois at Urbana-Champaign

## **Corresponding Author**

Noelle James

Department of Evolution, Ecology and Behavior

University of Illinois at Urbana-Champaign

439 Morrill Hall, 505 South Goodwin Ave.

Urbana, IL 61801

nholmes3@illinois.edu

## **Running Title**

Viral-mediated transgenesis of MAOA and AVP

## **Key Words**

aggression; behavioral genetics, *Gasterosteus aculeatus*; gene transfer; herpes simplex virus type I; neurosurgery; territoriality; threespine stickleback; transgenesis

## **Major Findings**

Forced expression of MAOA or AVP resulted in more attacks, showing a causal link between genes and behavior.

## **Word Counts**

Abstract: 246

Introduction: 1158

Discussion: 1902

## 35 **Abstract**

36       Establishing a causal relationship between genes and social behavior is challenging. To enable  
 37       direct manipulation of candidate genes and thereby examine how their expression contributes to  
 38       behavior, we developed a neurosurgical method to deliver pharmacological agents or transgenic  
 39       elements directly into the threespine stickleback (*Gasterosteus aculeatus*) brain. Threespine sticklebacks  
 40       are a classic system for the study of behavior, ecology, and evolution. Male sticklebacks defending  
 41       nesting territories are highly aggressive toward intruders. Previous studies in stickleback have shown  
 42       that aggression is heritable, and that hundreds of genes are differentially expressed in the brain following  
 43       territorial intrusion.

44       We use viral-mediated transgenesis to test the effects on territorial aggression of overexpression  
 45       of candidate genes, monoamine oxidase (MAOA) and arginine vasopressin (AVP), in the stickleback  
 46       brain. Male sticklebacks received transcranial injections of mammalian homolog cDNA packaged in a  
 47       replication-deficient Herpes Simplex Virus 1 carrier. Animals transfected with either AVP or MAOA  
 48       constructs were more aggressive in response to a territorial intruder, unlike control animals transfected  
 49       with a fluorescent protein.

50       Viral-mediated transgenesis is a promising method to examine genetic underpinnings of  
 51       behaviors. Our success demonstrates that widely available mammalian plasmids work with this method,  
 52       lowering the barrier of entry to the technique. This method is flexible, fast, and amenable to statistically  
 53       powerful within-subject experimental designs, making it practical for use in natural populations. It  
 54       further enhances the growing molecular toolkit in threespine stickleback, a classic ethological system,  
 55       and is the first step toward using chemogenetics and optogenetics.

56

## 57 **Introduction**

58       Complex behaviors have been repeatedly shown to be heritable (reviewed in Dochtermann et al.,  
59 2019), yet establishing a causal relationship between genes and social behavior remains challenging.  
60 Partially, this difficulty arises from limitations of the primarily correlative methods for examining the  
61 interplay between genes and behavior (Charney 2017), such as QTL, GWAS, and RNAseq studies.  
62 These types of studies are certainly a necessary step generating many candidate genes. However, to fully  
63 characterize how a gene contributes to behavior, it is necessary to consider not just sequence differences,  
64 but also regulatory and epigenetic influences. Therefore, to demonstrate and fully characterize a causal  
65 relationship between a gene and behavior, it is crucial to have a method for manipulating gene  
66 expression at a specific time and location. We developed one such method, viral-mediated transgenesis,  
67 for the classic ethological system of threespined stickleback (*Gasterosteus aculeatus*).

68       Stickleback fish are an emerging model system with a fully sequenced genome and growing  
69 molecular toolkit. Already one of the best-studied animals for behavior (Huntingford & Ruiz-Gomez  
70 2009), sticklebacks are now are gaining popularity in other fields including evolution, physiology, and  
71 comparative genomics (Fang *et al.* 2018). In addition to having a fully sequenced genome, they have  
72 been used in comparative cross-taxa studies looking for a conservation in the molecular underpinnings  
73 of social behavior (Rittschof *et al.* 2014; Saul *et al.* 2019) with both emerging and classic model  
74 systems. Indeed, there are already hundreds of previously identified candidate genes for social behavior  
75 waiting to be characterized (Sanogo *et al.* 2011; Laine *et al.* 2012; Greenwood *et al.* 2013; Mommer &  
76 Bell 2014; Greenwood & Peichel 2015; Bell *et al.* 2016; Bukhari *et al.* 2017) and well-established  
77 behavioral assays (van Iersel 1953; Rowland 1982) that are amenable to automation (Ardekani *et al.*  
78 2013; Norton & Gutiérrez 2019).

79 To enable direct manipulation of these candidate genes and thereby examine how they contribute  
80 to behavior, we developed a neurosurgical method to deliver either pharmacological agents or transgenic  
81 elements directly into the stickleback brain. There is a dearth of information on surgical methodology in  
82 small (3-4 cm) fish, necessitating a refining of the anesthesia process (Neiffer & Stamper 2009; Sladky  
83 & Clarke 2016) and building a custom surgical rig (Zou *et al.* 2014). To maximize animal welfare, we  
84 additionally needed to identify clear warning signs of failure to recuperate by establishing a normal  
85 recovery pattern in stickleback similar to the work in koi by Harms *et al.*, (2005).

86 As the first test of this method in this species, we chose to focus on territorial aggression for  
87 three reasons: 1) it is easy to score, 2) aggression is important for fitness, 3) there are good candidate  
88 genes for aggression based on studies in other vertebrates. Here we employ this neurosurgical method to  
89 test the function of two conserved candidate genes related to aggression in stickleback. With a repeated  
90 measures, within-subjects design, we show that this method can be used to induce and detect changes in  
91 behavior with reasonable samples sizes even with animals from a natural population. Thus, it is now  
92 possible to examine changes in gene expression as a mechanism underlying behavioral plasticity in this  
93 system.

94 Aggression is a well-studied, complex behavior with important social and fitness repercussions  
95 (Takahashi & Miczek 2014; Freudenberg *et al.* 2016; Malki *et al.* 2016; Waltes *et al.* 2016). Many  
96 subprocesses including perception, motivation, and cognition (O'Connell & Hofmann 2011b; O'Connor  
97 *et al.* 2015; Reichert & Quinn 2017) must function together to determine when and how aggressively an  
98 individual should behave. The integration of these processes occur within the Social Behavioral  
99 Network (SBN) of the brain (O'Connell & Hofmann 2011a), which has good functional homology  
100 across vertebrate taxa. Finally, aggression is experimentally tractable in stickleback fish as it is heritable

(Bakker 1994; Bell 2005), repeatable (Wootton 1971), and quick to measure. We selected arginine-vasopressin and monoamine oxidase as candidate genes in this study.

Arginine-vasopressin (AVP) and its nonmammalian homolog arginine-vasotocin (AVT) are highly conserved (Moore 1992) and pleiotropic (Balment *et al.* 2006). Vasopressin and vasotocin are distinguished by only a single amino acid change between mammals (human) and teleosts (sticklebacks), and their respective  $V_{1a}$  receptors have similar specificity, signaling mechanisms, and amino acid sequences (Goodson & Bass 2001). Both vasopressin and vasotocin were found to have similar physiological effects in rats (Feuerstein *et al.* 1984). Additionally, vasotocin signaling has been shown to influence aggression in various contexts in both fish and mammals (reviewed in Goodson, 2013) and has been characterized throughout the SBN (Albers 2015). In fact, nonapeptide hormones (vasopressin/vasotocin, isotocin/mesotocin, and oxytocin) in all taxa interact with sex steroids to influence behavior (Goodson & Bass 2001; Stoop 2012), making them quintessential behavioral candidate genes.

In sticklebacks, vasotocin peaks during the start of the breeding season in both males and females (Gozdowska *et al.* 2006). Nesting male sticklebacks have an increase in vasotocin levels in their brains following a mirror (aggression) challenge (Kleszczyńska *et al.* 2012). The arginine-vasopressin-like (*avpl*) gene showed the greatest overexpression in dominant versus subordinate zebrafish (Filby *et al.* 2010), further supporting its role in aggressive behavior in teleosts. Vasotocin in adult teleosts is mainly located in the preoptic area (POA) of the hypothalamus (Huffman *et al.* 2012; Albers 2015; Kagawa *et al.* 2016), where it is an active regulator in the Hypothalamic-Pituitary-Adrenal (HPA) axis (Arnett *et al.* 2016). Therefore, we hypothesized that supplemental expression of arginine vasopressin within the socio-behavioral network of the stickleback brain would increase aggression because

vasotocin regulates the HPA axis through adrenocorticotrophic hormone (ACTH) signaling to gonadal hormones.

Monoamine oxidase, our other candidate gene, has a longstanding association with aggression (Godar *et al.* 2016), not only in model systems but also in humans (Brunner *et al.* 1993). In humans, MAOA levels are inversely correlated with aggression (Alia-Klein *et al.* 2008). Further, low MAOA activity is associated with increased aggressive response following provocation (Gilad *et al.* 2002), antisocial outcomes (Ouellet-Morin *et al.* 2016), and sex-related aggressive crimes in the case of complete deficiency (Brunner *et al.* 1993). Mice with no MAOA activity showed increased fearfulness as juveniles and increased aggression in adult males (Cases *et al.* 1995). Recent work has suggested that MAOA allelic variants may be related to the domestication of dogs, a process which included a marked decrease in aggression (Sacco *et al.* 2017). Teleosts have only one monoamine oxidase gene (MAO) as opposed to the two found in mammals (MAOA and MAOB). Stickleback MAO (ENSGACT00000012444.1) and mouse MAOA (NP\_776101.3) have 68% conservation at the protein level. Despite the low level of conservation, the teleost monoamine oxidase gene has been shown to influence aggression (Freudenberg *et al.* 2016; Malki *et al.* 2016; Quadros *et al.* 2018) and is functionally comparable (Shih *et al.* 1999; Arslan & Edmondson 2010). Since a low level of monoamine oxidase is associated with increased aggression, increased expression of MAOA was expected to decrease aggression through serotonin turnover.

## **Materials and Methods**

### *Animals*

Freshwater adult fish were collected from Putah Creek, CA and housed in the lab in 83 L

(107x33x24 cm) group tanks with recirculated freshwater (5 ppm salt). The room was maintained at 18 °C on a 16:8 (L:D) “breeding” photoperiod from April to October and otherwise an 8:16 (L:D) “non-breeding” photoperiod. Males were identified by nuptial coloration (secondary sexual characteristics) and by sexing via PCR (Peichel *et al.* 2004). They were weighed and measured (standard length from nose to caudal peduncle), and then moved to individual, visually-isolated 9.5 L (32x21x19 cm) tanks lined with gravel and containing a synthetic plant. Each individual was allowed to acclimate, undisturbed for 3 days prior to any behavioral measurements. All animal work was done in compliance with IACUC protocols (#15077 & #18080) at the University of Illinois at Urbana-Champaign.

### *Behavioral assays*

All behavioral data were gathered double-blind to the transfected gene. Males’ breathing rate and behavioral response to a territorial challenge were recorded four times (Figure 1): twice before and twice after injection, respectively considered baseline and transfected. Breathing rate was determined prior to the territorial challenge by averaging two separate non-continuous counts of opercular beats per 20 seconds taken within a 5 minute period. This ensured that individual variations due to stress from the researcher’s arrival were minimized. Territorial aggression was measured by recording the individual’s response to an intruder confined to a glass flask. The times to orient toward and to first bite at the intruder (TTO and TTB, respectively) were recorded, as well as the total number of bites, charges (lunges), and trips (approaches) during the five minutes following initial orientation. Intruders ( $N = 9$ ) were 5-10% smaller conspecific males. Each focal male except one was confronted by the same intruder during all four territorial challenges. In the exception, the initially paired intruder died between trials two and three and was replaced with a new male of the same length.

## 167 *Constructs*

168 Mammalian cDNA ORF clones were used for AVP (human, HG17671-UT, NCBI Ref Seq:  
169 NM\_000490.4, Sino Biological) and MAOA (mouse, MG57436-U, NCBI Ref Seq: NM\_173740.3, Sino  
170 Biological, Beijing, China). These were cloned into the pDONR221 backbone (Epoch Life Science,  
171 Missouri City, TX) and then packaged (Gene Delivery Technology Core, Massachusetts General  
172 Hospital, Boston, MA) with an IRES-GFP backbone in replication deficient Herpes Simplex 1 (HSV-1).  
173 Stock hCMV-EYFP (RN12) was used for control injections. All males were randomly assigned to one  
174 of the three constructs. The final viral solutions were used undiluted except for the addition of a trace  
175 amount of pigment (brilliant blue FCF or tartrazine, i.e. FD&C Blue No. 1 and Yellow No. 5) to allow  
176 the solution to be visualized against the gradations of the syringe. These constructs are episomally  
177 expressed; the payload genes, packaged as a plasmid, remain in the cytoplasm and neither integrate into  
178 nor replicate with the genome.

179 Three promoters were piloted to drive gene expression based on work in zebrafish (Zou *et al.*  
180 2014) – a long-term promoter (hCMV,  $N = 43$ , Figure 2) resulting in fluorescent signal 2-5 weeks after  
181 injection, a short-term promoter (mCMV,  $N = 10$ ) with expression between 4 and 7 days post-injection,  
182 and a retrograde promoter (hEF1a,  $N = 7$ ) which did not result in a detectable fluorescent signal.  
183 Promoters were tested for their ability to drive a fluorescent protein (EGFP, EYFP, GCaMP6f, or  
184 mCherry). The long-term promoter (hCMV) was selected as the most useful due to its longer window of  
185 effect and was used in all experimental gene transfection trials.

## 186 *Neurosurgical injection and surgical rig*

187 In a ten-minute neurosurgical procedure, a suspension of foreign material (saline, HSV with  
188 construct, or pharmacological agents) was injected into the anterior diencephalon of the brain via a



transcranial injection. For this procedure, we developed a custom-built surgical rig (Figure 3). The complete parts list along with assembly instructions are publicly available through the Open Science Framework (<https://osf.io/sgpvm>).

Fish were transferred into a new tank in the surgery room the morning of the injection. Initial anesthetization was done in 0.02% buffered MS-222 (Tricane-S, Western Chemical, Fisher) for no more than five minutes ( $188.4 \text{ sec} \pm 74.0$ ), until movement ceased and the fish was unresponsive. The fish was transferred to the surgical rig and held securely in a small clamp, lined on one side with foam tape for padding. A cannula delivered fresh water with maintenance level anesthesia throughout the procedure. The speed of water delivery was adjusted to each fish to allow a steady low flow rate over the gills.

Each fish received two bilateral transcranial injections delivering a total of ~600nl of construct to the anterior diencephalon. During each injection, ~100nl was delivered at three different depths ( $\leq 2.5\text{mm}$ ), ensuring broad expression throughout the diencephalon. The stickleback brain is visualizable through the skull (Supplemental Figure 2), allowing injection sites to be selected with moderately high precision. Viral construct was injected using a 5  $\mu\text{L}$  borosilicate syringe (Hamilton Neuros model 75, #65460-02, Reno, NV). In each injection, the 33G (0.210 mm OD) needle was inserted transcranially through the thinnest portion of the skull.

Breathing rate and the fish's position in the water column was recorded every 15 minutes for two hours following the injection. Additional checks were performed at three hours and one-day post-injection for all fish. Out of 183 total fish receiving brain injections, 19 did not survive this initial three-hour recovery period; nine did not survive anesthetization and ten were euthanized. After two days, fish were removed from the ABSL-2 surgical room to individual tanks.

## 211 *Pharmacological treatments*

212 Exogenous [Arg8]-Vasotocin (Genscript RP10061, Piscataway, NJ) was administered either  
 213 directly into the brain via injection using the neurosurgical protocol described above or systemically via  
 214 intraperitoneal (IP) injection using a 30G (0.312 mm OD) insulin needle. Because behavioral response  
 215 has been reported to differ in teleosts based on dosage (Santangelo & Bass 2006; Gonçalves & Oliveira  
 216 2011), a dose-response curve (0.5, 5, and 10 µg per gram body weight) was tested. Manning compound  
 217 (Bachem H-5350.0001, VWR), a potent V<sub>1</sub> receptor antagonist (anti-vasopressor) was administered  
 218 systemically via IP injection at a dosage of 3 µg per gram body weight. Both pharmacological agents  
 219 were freshly diluted on the day of injection from a pre-suspended concentrated stock solution such that  
 220 all IP injections delivered 10 µL per gram body weight. Behavioral assays were performed 48 hours  
 221 prior to pharmacological manipulation for baseline measurements, and then at 30 minutes after IP  
 222 injection or 2 hours after brain injection. Preliminary saline injections showed that 30 minutes was  
 223 sufficient for both physiological and behavioral recovery from the IP injection procedure.

## 224 *R statistical analysis and data availability*

225 Descriptive statistics are presented as mean ± standard deviation. All data analysis was carried  
 226 out in RStudio (v1.1.383) with R version 3.5.1. All scripts and data are publicly available on the Open  
 227 Science Framework (<https://osf.io/v56zt>) as “Neurosurgical Protocol scripts.R” for the injection  
 228 optimization and as “Behavioral experiments scripts for release.R” for the viral-mediated transgenesis.  
 229 Survival rate differences for the neurosurgical optimization were calculated using the chi-squared  
 230 function with continuity correction. A nonparametric-compatible repeated-measures ANOVA was done  
 231 via the MANOVA.RM (v0.3.2) package with the ANOVA type statistic (ATS) reported because the  
 232 assumption of sphericity could not be met for breathing rate over time (Mauchly tests for sphericity =  
 233 0.02, p = 1.65e-74). We report the ANOVA-Type Statistic (ATS) and the adjusted degrees of freedom,

the latter of which are based on the number of treatment levels, number of observations, and the variance of ranks in each treatment (Shah & Madden 2004). For interaction effects, we report the recommended  $F_{(\hat{f}, \infty)}$  instead of  $F_{(\hat{f}, \hat{f}_0)}$  (Noguchi *et al.* 2012). Post-hoc calculation by time point was done via Wilcoxon rank sum test with continuity correction and the `rcompanion` (v2.2.1) `wilcoxonR` function. P-values were then adjusted for false discovery rate (fdr method). Repeatability is reported as ICC3,1 calculated using `DescTools` (v0.99.25) and confirmed with the nonparametric concordance package `nopaco` (v1.0.6). Significance was similar between the ICC and concordance tests. Spearman correlations were calculated using `Hmisc` (v4.1-1). Wilcoxon and Mann-Whitney tests were done with the base `stats` package and effect size was calculated with the `rcompanion` package (v2.2.1). Finally, sample size calculations utilized the `WMWsp` package (0.3.7) with the defaults of 0.05% for two-sided type I error rate and 0.8 power.

## **Results**

### *Neurosurgical injection*

Fish generally returned to normal swimming and water column use within 15 minutes after removal of anesthesia. Initial piloting and optimization of the transcranial injection procedure ( $N = 62$ ) revealed breathing rate followed a typical pattern after the operation which we called a recovery curve (Figure 4). Breathing rate peaked about 30 minutes post-surgery and returned to baseline levels by 90 minutes after the neurosurgical procedure. Supplemental oxygenation for up to two days following surgery did not improve survival ( $\chi^2(1, N_{\text{Extra O}_2} = 94, N_{\text{Normal}} = 89) = 0.02, p\text{-value} = 0.89$ ) or recovery ( $ATS_{1, 7465} = 0.94, p\text{-value} = 0.33$ , Supplemental Figure 3). Bilateral transcranial injections did not alter survival rates ( $\chi^2(1, N_{\text{Unilateral}} = 64, N_{\text{Bilateral}} = 119) = 0.46, p\text{-value} = 0.50$ ) compared to a unilateral

injection. Full mating behavior occurred within three days post-surgery for males, determined by nesting behavior, and within nine days for females, determined by the presence of eggs.

Fish had comparable outcomes regardless of the type of injected materials ( $\chi^2$  (3,  $N_{HSVI} = 113$ ,  $N_{Pharma} = 22$ ,  $N_{Saline} = 48$ ) = 2.30,  $p$ -value = 0.32). After the surgical technique was refined, the procedure's survival rate was approximately 90%. In total, 113 fish were injected with one of three constructs utilizing replication deficient herpes-simplex 1 for transfection; 101 survived. The fish injected with pharmaceutical agents fared similarly, with 20 of 22 fish surviving. Control fish injected with saline naturally fared least well as they were used to initially pilot and refine the surgical technique; they counted 39 survivors among 48 fish, an 81% survival rate.

The time for recovery of fish injected with a replication deficient herpes-simplex 1 (HSV-1) did not differ from that of saline injected controls ( $ATS_{3.7, \infty} = 1.83$ ,  $p$ -value = 0.12). The choice of promoter did not alter survival rate ( $\chi^2$  (2) = 1.38,  $p$ -value = 0.50, Table 1A), nor was there a main effect of promoter ( $ATS_{2, 143} = 0.33$ ,  $p$ -value = 0.70) on the recovery curve. Using the hCMV promoter, fluorescent protein expression was detected up to five weeks after injection. Additionally, the specific gene being expressed had no effect ( $\chi^2$  (3) = 2.16,  $p = 0.54$ , Table 1B) on survival rates relative to saline injected controls. The recovery rate was also unaffected by the gene expressed ( $ATS_{2, 267} = 1.19$ ,  $p$ -value = 0.31, Supplemental Figure 4).

### *Vasotocin pharmacological treatment*

Exogenous vasotocin injection into the brain increased breathing rate rapidly relative to saline injected controls ( $ATS_{1, 599} = 8.74$ ,  $p$ -value = 0.003, Figure 5). This effect began within 15 minutes and persisted for more than two hours post-injection. The most pronounced difference in breathing rate was between 0.75- to 1.5-hour post-injection (Supplemental Table 1). Intraperitoneal injection of exogenous

vasotocin also resulted in a rapid increase in breathing rate (Supplemental Figure 5). Behaviorally, brain and IP injections of exogenous vasotocin produced parallel results (Supplemental Table 2), in which only the highest dosage (10 µg per gram body weight) altered the number of charges directed at the intruder.

### *Behavioral repeatability and intercorrelations*

Repeatability was analyzed across the two trials at each timepoint (baseline and transfected). Only behaviors that were consistently repeatable, i.e. at both baseline and following transfection but not necessarily between the timepoints (Supplemental Table 3), were considered in subsequent analysis. Aggression measures were generally equally repeatable compared to the physiological measure of breathing rate. However, time to orient was not repeatable at baseline nor following transfection for any construct (Supplemental Table 3). The number of trips was not repeatable for control fish (EYFP), nor for any construct across all four trials ( $ICC_{EYFP} = 0.01$ ,  $ICC_{AVP} = 0$ ,  $ICC_{MAOA} = 0.01$ ). Time to orient was not significantly different for any construct (Supplemental Figure 5). Therefore, subsequent analyses focus on bites and charges.

Total number of bites and charges were strongly correlated ( $r \geq 0.7$ ) in the control group (Figure 6A) and following transfection of either AVP (Figure 6B) or MAOA (Figure 6C). Time to first bite was negatively correlated with total number of bites and charges as well – i.e. fish that bit sooner also attacked more overall.

### *Increased aggression from transfection of MAOA or AVP*

Aggressive behavior (charges) increased in fish transfected with either AVP or MAOA. AVP had a large effect on the number of charges (paired Wilcoxon signed rank test:  $rs = 0.79$ ,  $Z = -3.07$ ,  $p$ -value = 0.001) with 16 of the 18 individuals increasing the average number of charges compared to their

baseline. In magnitude, this represented an almost 100% increase in average number of charges, from 9.7 ( $SD = 5.1$ ) at baseline to 18.8 ( $SD = 10.6$ ) following transfection. Transfection with MAOA also caused a large increase in the average number of charges (paired Wilcoxon signed rank test:  $rs = 0.53$ ,  $Z = -2.10$ ,  $p\text{-value} = 0.018$ ) relative to baseline. However, the effect of MAOA was less drastic than that of AVP and had more variation in individual response (Figure 7), with 13 of 20 individuals increasing their average number of charges. Despite this, MAOA still resulted in an approximately 50% increase from 12.1 ( $SD = 9.7$ ) charges at baseline to 19.1 ( $SD = 10.0$ ) following transfection.

### *MAOA decreased breathing rate*

Only the MAOA construct altered breathing rate (Figure 8). Compared to baseline, MAOA strongly and significantly ( $N = 20$ ,  $rs = 0.85$ ,  $Z = -3.62$ ,  $p\text{-value} = 0.0001$ ) lowered breathing rate, with 19 of the 20 individuals experiencing a decrease in resting breathing rate. They dropped from an average of 40.8 ( $SD = 1.9$ ) to 38.1 ( $SD = 2.0$ ) breaths per 20s. Additionally, when comparing the breathing rates between the fish transfected with MAOA and the EYFP controls ( $N = 16$ ,  $mean = 40.8$ ,  $SD = 3.9$ ), the decrease was still significant, though reduced to a moderate effect size (Mann-Whitney test:  $rs = 0.44$ ,  $Z = -2.65$ ,  $p\text{-value} = 0.009$ ). There was not significant change in breathing rate compared to baseline due to either the control EYFP ( $Z = -1.11$ ,  $p\text{-value} = 0.13$ ) or AVP ( $Z = -0.92$ ,  $p\text{-value} = 0.18$ ) constructs.

## **Discussion**

### *Neurosurgical procedure & viral-mediated transgenesis*

We present a new method for direct injection of transgenic or pharmaceutical material into the brains of the small teleost fish threespined stickleback. Developing a minimally invasive neurosurgical protocol required 1) refining the anesthesia process, 2) building a custom surgical rig, and 3)

determining the normal recovery pattern allowing us to clearly identify warning signs of failure to thrive. Our surgical rig and optimized anesthetization methods (Neiffer & Stamper 2009; Sladky & Clarke 2016) resulted in high (90%) survival rates and quick behavioral recovery. Mating behavior also recovered promptly: males completed nests at three days post-surgery, and females were gravid at nine days – suggesting almost no delay in the egg development time (Baker *et al.* 2008) after losing any ripe eggs to clamping during surgery.

Exogenous vasotocin administered directly to the brain produced physiological and behavioral responses mirrored in fish receiving vasotocin through IP injections (Supplemental Table 2). These pharmacological results were similar to those seen in other fish (Lema & Nevitt 2004; Santangelo & Bass 2006; Filby *et al.* 2010). This indicates that brain injection is now a feasible delivery route for drugs that do not pass through the blood brain barrier (Cook *et al.* 2009).

Viral-mediated transgenesis resulted in altered territorial aggression specifically for fish receiving candidate genes related to aggression, but not for a fluorescent protein. Additionally, we found that construct selection is not limited to native genes; widely available mammalian plasmids successfully altered behavior. This method is therefore accessible to a broad array of users, a feature especially important in a system with roots in ethology. Furthermore, transfection enables within-subject experimental designs, reducing sample sizes required for the same statistical power and making behavioral experiments viable, as detailed below. Finally, rapid behavioral recovery makes viral-mediated transgenesis a viable technique for direct manipulation of candidate genes.

Viral-mediated transgenesis is a method to alter a gene's expression in a specific location or during a controlled timeframe. This approach has already proved essential in the functional testing of genes related to behavior in rodents (Simonato *et al.* 2000) and in the dissection of neural circuits (Luo *et al.* 2008). In addition to the experimental uses demonstrated here, viral-mediated transgenesis can also

be used to knockdown gene expression using CRISPR or shRNA in the same backbone (Anesti *et al.* 2008). We successfully used multiple promoters to drive expression, allowing tailored expression profiles through time. Additionally, while we used ubiquitous promoters with differing timings, cell-specific targeting can be done by using an alternate promoter (see Ingusci *et al.*, 2019). Our use of HSV enables larger payloads than adeno-associated viruses (AAVs), making this protocol the first step toward using chemogenetics such as DREDDs (designer receptors exclusively activated by designer drugs, reviewed in Roth, 2016) and optogenetics in sticklebacks.

While sticklebacks are a non-traditional genetic model system, they are one of the best studied behavioral systems, with well described intra-specific variation in aggression, antipredator behavior, and parental care (Huntingford & Ruiz-Gomez 2009; Hendry *et al.* 2013; Fang *et al.* 2018). Previous studies have identified hundreds of genes that are differentially expressed in the brain in response to a social interaction (Sanogo *et al.* 2011; Laine *et al.* 2012; Greenwood *et al.* 2013; Mommer & Bell 2014; Greenwood & Peichel 2015; Bell *et al.* 2016; Bukhari *et al.* 2017). However, most of these studies are correlative, and thus the direction of the causal relationship – much less the mechanisms by which changes in gene expression underlie behavior – are still not clear. This method will allow us to rigorously test how these genes contribute to future behaviors on every level, from detailed mechanistic protein analyses to broad whole-organism phenotypic studies.

### *Viral-mediated transgenesis allows statistically powerful repeated measures design*

Complex phenotypes that emerge at the whole organism level, such as behaviors like aggression, are difficult to assay due to their subtleties and time-intensive screening. Social behaviors are influenced by many genes of small effect (Spencer *et al.* 2009; Wahlsten 2012) and social psychology generally has smaller effect sizes ( $r$ ) relative to other psychological sub-disciplines (Schäfer & Schwarz 2019). Indeed, the neuroscience, psychiatry, psychology, and behavioral ecology fields are plagued with reports



of overestimates of effect sizes (Forstmeier & Schielzeth 2011; Button *et al.* 2013; Fanelli & Ioannidis 2013; Schäfer & Schwarz 2019). Additionally, behavior in natural populations tends to have high inter-individual variation, further reducing statistical power (Taborsky 2010). For sticklebacks, who have a generation time of approximately one year, the traditional approach of breeding a stable transgenic line is not always practical. Here, by using within-subject design, we successfully examined two behaviorally relevant genes for effects on aggression in wild-caught fish.

By using repeated measures on the same fish before and after transfection, we were able to drastically reduce the necessary sample size needed to detect significant changes in behavior. In this study we found large effect sizes for both behavior and breathing rate, a typical physiological measure. However, variation following transfection with MAOA was about 25 times larger for charging behavior ( $\sigma^2 = 99.9$ ) compared to breathing rate ( $\sigma^2 = 3.9$ ). A between group comparison would have required an impractical sample size of as many as 300 fish (Table 2) to detect the difference in charges, even though these genes have a large magnitude ( $r_s > 0.5$ ) of effect on behavior. However, by using these methods we were able to reduce the sample size down to merely 20 fish, a far more manageable sum. Thus, viral-mediated transgenesis enables the study of genetic effects on natural behavior in wild-caught animals, because it makes possible a repeated measures design comparing within the same individuals, increasing sensitivity.

### *Genetic underpinnings of territorial aggression*

To demonstrate the practicality of viral-mediated transgenesis to examine candidate gene function on behavior, we looked for behavioral changes from two aggression related candidate genes. Both vasopressin (AVP) and monoamine oxidase (MAOA) are well established as influencing aggression (Goodson 2013).

390 The effects of pharmacological manipulation of vasotocin or vasopressin on aggression in  
 391 teleosts has been mixed (Santangelo & Bass 2006; Gonçalves & Oliveira 2011), purportedly depending  
 392 on dosage, species, or receptor localization. In every case of vasotocin signaling manipulation that we  
 393 tested – pharmacological IP inhibition (Manning compound) or supplementation, exogenous brain  
 394 injection, and transfection – number of charges at the intruder was the main responding aggressive  
 395 behavior. This matches the effects of vasotocin seen in pupfishes (Lema & Nevitt 2004). Here, we found  
 396 that viral-mediated transfection was more robust than either IP or direct brain injection of exogenous  
 397 vasotocin. The effect following transfection was consistent, with 16 of the 18 fish experiencing an  
 398 increase in aggression, one remaining constant and only one decreasing aggression, and was of stronger  
 399 magnitude than pharmacological manipulation (Figure 7). This is not entirely surprising given  
 400 vasopressin’s extremely short half-life (<1 minute in the rat brain (Stark *et al.* 1989)). Transfection  
 401 allows for a continual, natural production of vasotocin that may bypass immediate biofeedback  
 402 mechanisms and allows for stabilization of the HPA axis following treatment.

403 A more detailed, cross-population study of vasotocin in stickleback would present an ideal  
 404 opportunity to investigate the evolutionary constraints or trade-offs between behavior and physiology for  
 405 pleiotropic genes. In addition to being associated with behavior, vasotocin plays a key role in  
 406 osmoregulation via the AVP V2 receptors. Vasotocin anatomy and aggression differed in concordantly  
 407 with salinity and osmoregulation challenges in pupfish (Lema 2006). A more nuanced examination is  
 408 possible in stickleback as there are numerous freshwater and several anadromous populations that are  
 409 independently evolved from ancestral-like marine population. In addition, population differences in  
 410 aggression have already been documented in sticklebacks (Bell 2005; Dingemanse *et al.* 2007; Keagy *et*  
 411 *al.* 2016). However, an examination of the integration of these two evolutionary concerns has not yet  
 412 been undertaken, despite a relationship between aggression and kidney size having already been

discovered in stickleback bred for extremes of territorial aggression (Bakker 1986). This makes stickleback uniquely suited system to address the relationship of physiological ecology, anatomy, and social behavior (Goodson 2013).

We also looked at aggression following overexpression of MAOA, a gene which is well established to increase aggression when downregulated (Godar *et al.* 2016). Therefore we expected overexpression of MAOA in this study to produce the opposite behavioral effect of decreased expression. However, counter to our hypothesis, and similar to AVP, aggression also increased following transfection of MAOA (Figure 7). In mice, increased MAOA levels resulting from a knockout of Rines E3 ubiquitin ligase produced emotional behavior abnormalities, namely heightened anxiety and increased social interactions with an unfamiliar conspecific in both an unfamiliar space and during a resident-intruder test (Kabayama *et al.* 2013). In social rodents like mice, non-social stress has been found to promote affiliative behavior (Beery & Kaufer 2015). Thus, their increased affiliation is potentially explained as a response to stress rather than a direct effect of changes in monoamine oxidase levels. Stickleback do not naturally affiliate when stressed, but emotional behavior abnormalities and heightened anxiety could manifest as increased aggression.

Our finding that transfection of MAOA increased aggression is consistent with a decrease in serotonin, which is enzymatically cleaved by monoamine oxidase. Indeed, the clear and unambiguous decrease in breathing rate we observed (Figure 8) is strong evidence of MAOA functioning as expected physiologically. Breathing rate correlates positively with serotonin and norepinephrine concentration (Whelan & Young 1953; Hodges & Richerson 2008); monoamine oxidase enzymatically lowers levels of both neurotransmitters. Additionally, in accordance with our findings, previous RNAseq data from nesting male sticklebacks (Bukhari *et al.* 2017) shows a similar if non-significant positive correlation between aggression and MAO expression (Figure 9). It is worth noting that in this previous study,

aggression was measured with only bites, time to orient and time to first bite at the intruder, which we found to have greater variance both within and between individuals than charging, which marks voluntary initiation of aggression (van Iersel 1953; Keagy *et al.* 2016); the decreased statistical power of these measures compared to number of charges may explain the lack of significance. Additionally, trout monoamine oxidase has been found to be equivalently effective to human monoamine oxidase in metabolizing 5-HT and PEA (Shih *et al.* 1999), making it unlikely that the increase in aggression is an off-target effect of using mammalian MAOA. Further characterization of anxiety levels following transfection, pharmacological rescue (Godar *et al.* 2014), and quantification of the downstream neurotransmitters remain as potential avenues to a better mechanistic understanding of this result.

## Conclusion

We present a method for brain injection and viral-mediated transgenesis that enables a more direct examination of the genetic mechanisms underlying behavior in wild-caught animals from natural populations. This method is appealing because it is flexible, fast, and allows us to compare individual behavior before and after transgenesis, maximizing statistical power. It further enhances the growing molecular toolkit in threespined stickleback, a classic ethological system. Overall, our experimental results show that viral-mediated transgenesis is a promising method for testing the function of candidate genes in this system and confirm the importance of MAOA and AVP for aggression in teleost fish. Transfection with a human-based AVP construct demonstrates that widely available, ready-to-use mammalian plasmids are viable with this method, lowering the barrier of entry. Finally, the unexpected result that increasing MAOA resulted in increased aggression indicates the need for a more complete characterization of monoamine oxidase's role in aggression at high levels.

## References

- Albers, H.E. (2015) Species, sex and individual differences in the vasotocin/vasopressin system: Relationship to neurochemical signaling in the social behavior neural network. *Front Neuroendocrinol* **36**, 49–71.
- Alia-Klein, N., Goldstein, R.Z., Kriplani, A., Logan, J., Tomasi, D., Williams, B., Telang, F., Shumay, E., Biegon, A., Craig, I.W., Henn, F., Wang, G.J., Volkow, N.D. & Fowler, J.S. (2008) Brain monoamine oxidase A activity predicts trait aggression. *J Neurosci* **28**, 5099–5104.
- Anesti, A.-M., Peeters, P.J., Royaux, I. & Coffin, R.S. (2008) Efficient delivery of RNA Interference to peripheral neurons in vivo using herpes simplex virus. *Nucleic Acids Res* **36**, e86–e86.
- Ardekani, R., Greenwood, A.K., Peichel, C.L. & Tavaré, S. (2013) Automated quantification of the schooling behaviour of sticklebacks. *EURASIP J Image Video Process* **2013**, 61.
- Arnett, M.G., Muglia, L.M., Laryea, G. & Muglia, L.J. (2016) Genetic Approaches to Hypothalamic-Pituitary-Adrenal Axis Regulation. *Neuropsychopharmacology* **41**, 245–260.
- Arslan, B.K. & Edmondson, D.E. (2010) Expression of zebrafish (*Danio rerio*) monoamine oxidase (MAO) in *Pichia pastoris*: Purification and comparison with human MAO A and MAO B. *Protein Expr Purif* **70**, 290–297.
- Baker, J.A., Heins, D.C. & Susan, A. (2008) An Overview of Life-History Variation in Female Threespine Stickleback Author ( s ): John A . Baker , David C . Heins , Susan A . Foster and Richard W . King Source : Behaviour , Vol . 145 , No . 4 / 5 , Fifth International Conference on Stickleback Behav. *Behaviour* **145**, 579–602.
- Bakker, T.C.M. (1986) Aggressiveness in Sticklebacks (*Gasterosteus Aculeatus* L.): a Behaviour-

479 Genetic Study. *Behaviour* **98**, 1–144.

480 Bakker, T.C.M. (1994) Genetic Correlations and the Control of Behavior, Exemplified by  
481 Aggressiveness in Sticklebacks. In *Advances in the Study of Behavior*, Academic Press, pp. 135–  
482 171.

483 Balment, R.J., Lu, W., Weybourne, E. & Warne, J.M. (2006) Arginine vasotocin a key hormone in fish  
484 physiology and behaviour: A review with insights from mammalian models. *Gen Comp Endocrinol*  
485 **147**, 9–16.

486 Beery, A.K. & Kaufer, D. (2015) Stress, social behavior, and resilience: Insights from rodents.  
487 *Neurobiol Stress* **1**, 116–127.

488 Bell, A.M. (2005) Behavioural differences between individuals and two populations of stickleback  
489 (*Gasterosteus aculeatus*). *J Evol Biol* **18**, 464–73.

490 Bell, A.M., Bukhari, S.A. & Sanogo, Y.O. (2016) Natural variation in brain gene expression profiles of  
491 aggressive and nonaggressive individual sticklebacks. *Behaviour* **153**, 1723–1743.

492 Brunner, H., Nelen, M., Breakefields, X., Ropers, H. & van Oost, B. (1993) Abnormal behavior  
493 associated with a point mutation in the structural gene for monoamine oxidase A. *Science* (80- )  
494 **262**, 578–80.

495 Bukhari, S.A., Saul, M.C., Seward, C.H., Zhang, H., Bensky, M., James, N., Zhao, S.D.,  
496 Chandrasekaran, S., Stubbs, L. & Bell, A.M. (2017) Temporal dynamics of neurogenomic plasticity  
497 in response to social interactions in male threespined sticklebacks. *PLoS Genetics* **13**, e1006840.

498 Button, K.S., Ioannidis, J.P. a, Mokrysz, C., Nosek, B. a, Flint, J., Robinson, E.S.J. & Munafò, M.R.  
499 (2013) Power failure: why small sample size undermines the reliability of neuroscience. *Nat Rev*

500 *Neurosci* **14**, 365–76.

501 Cases, O., Seif, I., Grimsby, J., Gaspar, P., Chen, K., Pournin, S., Müller, U., Aguet, M., Babinet, C. &  
502 Shih, J.C. (1995) Aggressive behavior and altered amounts of brain serotonin and norepinephrine in  
503 mice lacking MAOA. *Science* (80- ) **268**, 1763–6.

504 Charney, E. (2017) Genes, behavior, and behavior genetics. *Wiley Interdiscip Rev Cogn Sci* **8**.

505 Cook, A.M., Mieux, K.D., Owen, R.D., Pesaturo, A.B. & Hatton, J. (2009) Intracerebroventricular  
506 Administration of Drugs. *Pharmacotherapy* **29**, 832–845.

507 Dingemanse, N.J., Wright, J., Kazem, A.J.N., Thomas, D.K., Hickling, R. & Dawnay, N. (2007)  
508 Behavioural syndromes differ predictably between 12 populations of three-spined stickleback. *J*  
509 *Anim Ecol* **76**, 1128–1138.

510 Dochtermann, N.A., Schwab, T., Anderson Berdal, M., Dalos, J. & Royauté, R. (2019) The Heritability  
511 of Behavior: A Meta-analysis. *J Hered* **110**, 403–410.

512 Fanelli, D. & Ioannidis, J.P.A. (2013) US studies may overestimate effect sizes in softer research. *Proc*  
513 *Natl Acad Sci U S A* **110**, 15031–6.

514 Fang, B., Merilä, J., Ribeiro, F., Alexandre, C.M. & Momigliano, P. (2018) Worldwide phylogeny of  
515 three-spined sticklebacks. *Mol Phylogenet Evol* **127**, 613–625.

516 Feuerstein, G., Zerbe, R.L. & Faden, A.I. (1984) Central cardiovascular effects of vasotocin, oxytocin  
517 and vasopressin in conscious rats. *J Pharmacol Exp Ther* **228**, 348–53.

518 Filby, A.L., Paull, G.C., Hickmore, T.F. & Tyler, C.R. (2010) Unravelling the neurophysiological basis  
519 of aggression in a fish model. *BMC Genomics* **11**, 498.

520 Forstmeier, W. & Schielzeth, H. (2011) Cryptic multiple hypotheses testing in linear models:

521 Overestimated effect sizes and the winner's curse. *Behav Ecol Sociobiol* **65**, 47–55.

522 Freudenberg, F., Carreño Gutierrez, H., Post, A.M., Reif, A. & Norton, W.H.J. (2016) Aggression in  
523 non-human vertebrates: Genetic mechanisms and molecular pathways. *Am J Med Genet Part B*  
524 *Neuropsychiatr Genet* **171**, 603–640.

525 Gilad, Y., Rosenberg, S., Przeworski, M., Lancet, D. & Skorecki, K. (2002) Evidence for positive  
526 selection and population structure at the human MAO-A gene. *Proc Natl Acad Sci U S A* **99**, 862–7.

527 Godar, S.C., Bortolato, M., Castelli, M.P., Casti, A., Casu, A., Chen, K., Ennas, M.G., Tambaro, S. &  
528 Shih, J.C. (2014) The aggression and behavioral abnormalities associated with monoamine oxidase  
529 A deficiency are rescued by acute inhibition of serotonin reuptake. *J Psychiatr Res* **56**, 1–9.

530 Godar, S.C., Fite, P.J., McFarlin, K.M. & Bortolato, M. (2016) The role of monoamine oxidase A in  
531 aggression: Current translational developments and future challenges. *Prog Neuro-*  
532 *Psychopharmacology Biol Psychiatry* **69**, 90–100.

533 Gonçalves, D.M. & Oliveira, R.F. (2011) Hormones and Sexual Behavior of Teleost Fishes. In  
534 *Hormones and Reproduction of Vertebrates*, Elsevier, pp. 119–147.

535 Goodson, J.L. (2013) Deconstructing sociality, social evolution and relevant nonapeptide functions.  
536 *Psychoneuroendocrinology* **38**, 465–478.

537 Goodson, J.L. & Bass, A.H. (2001) Social behavior functions and related anatomical characteristics of  
538 vasotocin/vasopressin systems in vertebrates. *Brain Res Rev* **35**, 246–265.

539 Gozdowska, M., Kleszczyńska, A., Sokołowska, E. & Kulczykowska, E. (2006) Arginine vasotocin  
540 (AVT) and isotocin (IT) in fish brain: Diurnal and seasonal variations. *Comp Biochem Physiol - B*  
541 *Biochem Mol Biol* **143**, 330–334.



- 542 Greenwood, A.K. & Peichel, C.L. (2015) Social Regulation of Gene Expression in Threespine  
543 Sticklebacks. *PLoS One* **10**, e0137726.
- 544 Greenwood, A.K., Wark, A.R., Yoshida, K. & Peichel, C.L. (2013) Genetic and neural modularity  
545 underlie the evolution of schooling behavior in threespine sticklebacks. *Curr Biol* **23**, 1884–8.
- 546 Harms, C.A., Lewbart, G.A., Swanson, C.R., Kishimori, J.M. & Boylan, S.M. (2005) Behavioral and  
547 clinical pathology changes in koi carp (*Cyprinus carpio*) subjected to anesthesia and surgery with  
548 and without intra-operative analgesics. *Comp Med* **55**, 221–6.
- 549 Hendry, A.P., Peichel, C.L., Matthews, B., Boughman, J.W. & Nosil, P. (2013) Stickleback research:  
550 The now and the next. *Evol Ecol Res* **15**, 111–141.
- 551 Hodges, M.R. & Richerson, G.B. (2008) Contributions of 5-HT neurons to respiratory control:  
552 Neuromodulatory and trophic effects. *Respir Physiol Neurobiol* **164**, 222–232.
- 553 Huffman, L.S., O’Connell, L.A., Kenkel, C.D., Kline, R.J., Khan, I.A. & Hofmann, H.A. (2012)  
554 Distribution of nonapeptide systems in the forebrain of an African cichlid fish, *Astatotilapia*  
555 *burtoni*. *J Chem Neuroanat* **44**, 86–97.
- 556 Huntingford, F.A. & Ruiz-Gomez, M.L. (2009) Three-spined sticklebacks *Gasterosteus aculeatus* as a  
557 model for exploring behavioural biology. *J Fish Biol* **75**, 1943–1976.
- 558 van Iersel, J.J.A. (1953) An analysis of the parental behaviour of the male three-spined stickleback  
559 (*Gasterosteus aculeatus* L.). *Behaviour Suppl.* **3**, 1–159.
- 560 Ingusci, S., Verlengia, G., Soukupova, M., Zucchini, S. & Simonato, M. (2019) Gene Therapy Tools for  
561 Brain Diseases. *Front Pharmacol* **10**, 724.
- 562 Kabayama, M., Sakoori, K., Yamada, K., Ornthanalai, V.G., Ota, M., Morimura, N., Katayama, K. -i.,

563        Murphy, N.P. & Aruga, J. (2013) Rines E3 Ubiquitin Ligase Regulates MAO-A Levels and  
564        Emotional Responses. *J Neurosci* **33**, 12940–12953.

565        Kagawa, N., Honda, A., Zenno, A., Omoto, R., Imanaka, S., Takehana, Y. & Naruse, K. (2016)  
566        Arginine vasotocin neuronal development and its projection in the adult brain of the medaka.  
567        *Neurosci Lett* **613**, 47–53.

568        Keagy, J., Lettieri, L. & Boughman, J.W. (2016) Male competition fitness landscapes predict both  
569        forward and reverse speciation. *Ecol Lett* **19**, 71–80.

570        Kleszczyńska, A., Sokołowska, E. & Kulczykowska, E. (2012) Variation in brain arginine vasotocin  
571        (AVT) and isotocin (IT) levels with reproductive stage and social status in males of three-spined  
572        stickleback (*Gasterosteus aculeatus*). *Gen Comp Endocrinol* **175**, 290–296.

573        Laine, V.N., Primmer, C.R., Herczeg, G., Merilä, J. & Shikano, T. (2012) Isolation and characterization  
574        of 13 new nine-spined stickleback, *Pungitius pungitius*, microsatellites located nearby candidate  
575        genes for behavioural variation. *Ann Zool Fennici*.

576        Lema, S.C. (2006) Population divergence in plasticity of the AVT system and its association with  
577        aggressive behaviors in a Death Valley pupfish. *Horm Behav* **50**, 183–93.

578        Lema, S.C. & Nevitt, G.A. (2004) Exogenous vasotocin alters aggression during agonistic exchanges in  
579        male Amargosa River pupfish (*Cyprinodon nevadensis amargosae*). *Horm Behav* **46**, 628–637.

580        Luo, L., Callaway, E.M. & Svoboda, K. (2008) Genetic Dissection of Neural Circuits. *Neuron* **57**, 634–  
581        660.

582        Malki, K., Du Rietz, E., Crusio, W.E., Pain, O., Paya-Cano, J., Karadaghi, R.L., Sluyter, F., de Boer,  
583        S.F., Sandnabba, K., Schalkwyk, L.C., Asherson, P. & Tosto, M.G. (2016) Transcriptome analysis

584 of genes and gene networks involved in aggressive behavior in mouse and zebrafish. *Am J Med*  
585 *Genet Part B Neuropsychiatr Genet* **171**, 827–838.

586 Mommer, B.C. & Bell, A.M. (2014) Maternal Experience with Predation Risk Influences Genome-Wide  
587 Embryonic Gene Expression in Threespined Sticklebacks (*Gasterosteus aculeatus*). *PLoS One* **9**,  
588 e98564.

589 Moore, F.L. (1992) Evolutionary Precedents for Behavioral Actions of Oxytocin and Vasopressin. *Ann*  
590 *N Y Acad Sci* **652**, 156–165.

591 Neiffer, D.L. & Stamper, M.A. (2009) Fish sedation, anesthesia, analgesia, and euthanasia:  
592 Considerations, methods, and types of drugs. *ILAR J* **50**, 343–360.

593 Noguchi, K., Gel, Y.R., Brunner, E. & Konietzschke, F. (2012) nparLD : An R Software Package for the  
594 Nonparametric Analysis of Longitudinal Data in Factorial Experiments. *J Stat Softw* **50**.

595 Norton, W.H.J. & Gutiérrez, H.C. (2019) The three-spined stickleback as a model for behavioural  
596 neuroscience. *PLoS One* **14**, e0213320.

597 O’Connell, L. a. & Hofmann, H. a. (2011a) The Vertebrate mesolimbic reward system and social  
598 behavior network: A comparative synthesis. *J Comp Neurol* **519**, 3599–3639.

599 O’Connell, L.A. & Hofmann, H.A. (2011b) Genes, hormones, and circuits: An integrative approach to  
600 study the evolution of social behavior. *Front Neuroendocrinol* **32**, 320–335.

601 O’Connor, C.M., Reddon, A.R., Ligocki, I.Y., Hellmann, J.K., Garvy, K.A., Marsh-Rollo, S.E.,  
602 Hamilton, I.M. & Balshine, S. (2015) Motivation but not body size influences territorial contest  
603 dynamics in a wild cichlid fish. *Anim Behav* **107**, 19–29.

604 Ouellet-Morin, I., Côté, S.M., Vitaro, F., Hébert, M., Carbonneau, R., Lacourse, É., Turecki, G. &

605 Tremblay, R.E. (2016) Effects of the MAOA gene and levels of exposure to violence on antisocial  
606 outcomes. *Br J Psychiatry* **208**, 42–48.

607 Peichel, C.L., Ross, J.A., Matson, C.K., Dickson, M., Grimwood, J., Schmutz, J., Myers, R.M., Mori, S.,  
608 Schluter, D. & Kingsley, D.M. (2004) The master sex-determination locus in threespine  
609 sticklebacks is on a nascent Y chromosome. *Curr Biol* **14**, 1416–1424.

610 Quadros, V.A., Costa, F. V., Canzian, J., Nogueira, C.W. & Rosemberg, D.B. (2018) Modulatory role of  
611 conspecific alarm substance on aggression and brain monoamine oxidase activity in two zebrafish  
612 populations. *Prog Neuro-Psychopharmacology Biol Psychiatry* **86**, 322–330.

613 Reichert, M.S. & Quinn, J.L. (2017) Cognition in Contests: Mechanisms, Ecology, and Evolution.  
614 *Trends Ecol Evol* **32**, 773–785.

615 Rittschof, C.C., Bukhari, S.A., Sloofman, L.G., Troy, J.M., Caetano-Anollés, D., Cash-Ahmed, A.,  
616 Kent, M., Lu, X., Sanogo, Y.O., Weisner, P.A., Zhang, H., Bell, A.M., Ma, J., Sinha, S., Robinson,  
617 G.E. & Stubbs, L. (2014) Neuromolecular responses to social challenge: Common mechanisms  
618 across mouse, stickleback fish, and honey bee. *Proc Natl Acad Sci U S A* **111**, 17929–34.

619 Roth, B.L. (2016) DREADDs for Neuroscientists. *Neuron* **89**, 683–94.

620 Rowland, W.J. (1982) The Effects of Male Nuptial Coloration On Stickleback Aggression: a  
621 Reexamination. *Behaviour* **80**, 118–126.

622 Sacco, J., Ruplin, A., Skonieczny, P. & Ohman, M. (2017) Polymorphisms in the canine monoamine  
623 oxidase a (MAOA) gene: identification and variation among five broad dog breed groups. *Canine*  
624 *Genet Epidemiol* **4**, 1.

625 Sanogo, Y.O., Hankison, S., Band, M., Obregon, A. & Bell, A.M. (2011) Brain transcriptomic response

626 of threespine sticklebacks to cues of a predator. *Brain Behav Evol* **77**, 270–85.

627 Santangelo, N. & Bass, A.H. (2006) New insights into neuropeptide modulation of aggression: field  
628 studies of arginine vasotocin in a territorial tropical damselfish. *Proceedings Biol Sci* **273**, 3085–92.

629 Saul, M.C., Blatti, C., Yang, W., Bukhari, S.A., Shpigler, H.Y., Troy, J.M., Seward, C.H., Sloofman, L.,  
630 Chandrasekaran, S., Bell, A.M., Stubbs, L., Robinson, G.E., Zhao, S.D. & Sinha, S. (2019) Cross-  
631 species systems analysis of evolutionary toolkits of neurogenomic response to social challenge.  
632 *Genes Brain Behav* **18**, e12502.

633 Schäfer, T. & Schwarz, M.A. (2019) The Meaningfulness of Effect Sizes in Psychological Research:  
634 Differences Between Sub-Disciplines and the Impact of Potential Biases. *Front Psychol* **10**, 813.

635 Shah, D.A. & Madden, L. V. (2004) Nonparametric Analysis of Ordinal Data in Designed Factorial  
636 Experiments. *Phytopathology* **94**, 33–43.

637 Shih, J.C., Chen, K. & Ridd, M.J. (1999) MONOAMINE OXIDASE: From Genes to Behavior. *Annu*  
638 *Rev Neurosci* **22**, 197–217.

639 Simonato, M., Manservigi, R., Marconi, P. & Glorioso, J. (2000) Gene transfer into neurones for the  
640 molecular analysis of behaviour: focus on herpes simplex vectors. *Trends Neurosci* **23**, 183–190.

641 Sladky, K.K. & Clarke, E.O. (2016) Fish Surgery: Presurgical Preparation and Common Surgical  
642 Procedures. *Vet Clin North Am - Exot Anim Pract* **19**, 55–76.

643 Spencer, C.C.A., Su, Z., Donnelly, P. & Marchini, J. (2009) Designing genome-wide association  
644 studies: sample size, power, imputation, and the choice of genotyping chip. *PLoS Genetics* **5**,  
645 e1000477.

646 Stark, H., Burbach, J.P.H., Van Der Kleij, A.A.M. & De Wied, D. (1989) In vivo conversion of

647 vasopressin after microinjection into limbic brain areas of rats. *Peptides* **10**, 717–720.

648 Stoop, R. (2012) Neuromodulation by Oxytocin and Vasopressin. *Neuron* **76**, 142–159.

649 Taborsky, M. (2010) Sample size in the study of behaviour. *Ethology* **116**, 185–202.

650 Takahashi, A. & Miczek, K.A. (2014) Neurogenetics of aggressive behavior: studies in rodents. *Curr*  
651 *Top Behav Neurosci* **17**, 3–44.

652 Wahlsten, D. (2012) The hunt for gene effects pertinent to behavioral traits and psychiatric disorders:  
653 From mouse to human. *Dev Psychobiol* **54**, 475–492.

654 Waltes, R., Chiocchetti, A.G. & Freitag, C.M. (2016) The neurobiological basis of human aggression: A  
655 review on genetic and epigenetic mechanisms. *Am J Med Genet Part B Neuropsychiatr Genet* **171**,  
656 650–675.

657 Whelan, R.F. & Young, I.M. (1953) The effect of adrenaline and noradrenaline infusions on respiration  
658 in man. *Br J Pharmacol Chemother* **8**, 98–102.

659 Wootton, R.J. (1971) Measures of the aggression of parental male three-spined sticklebacks. *Behaviour*  
660 **40**, 228–62.

661 Zou, M., De Koninck, P., Neve, R.L. & Friedrich, R.W. (2014) Fast gene transfer into the adult  
662 zebrafish brain by herpes simplex virus 1 (HSV-1) and electroporation: methods and optogenetic  
663 applications. *Front Neural Circuits* **8**, 41.

664

665

## 666 **Acknowledgements**

667           Thanks to the Bell lab, especially Colby Behrens, Miles Bensky, Severin Odland, Christian  
668 Zielinski, Brianna Bowman, and Rachael Kirchschrager who assisted with neurosurgeries. Neurosurgery  
669 consultations provided by Dr. Helen Valentine, DVM, MS, DACLAM & Dr. Jennifer Criley, DVM,  
670 DACLAM. Viral packaging was provided by Dr. Rachael Neve of the Massachusetts General Hospital's  
671 Gene Delivery Technology Core. Dr. Rhanor Gillette and Dr. Gene Robinson provided equipment.  
672 Brian James assisted with surgical apparatus design and manuscript editing. This work was supported by  
673 NSF Edge Grant # 1645170 awarded to Dr. Daniel Bolnick, and co-PIs Alison Bell, Michael White,  
674 Craig Miller, and Kathryn Milligan-Myhre.

675

676



## Figures

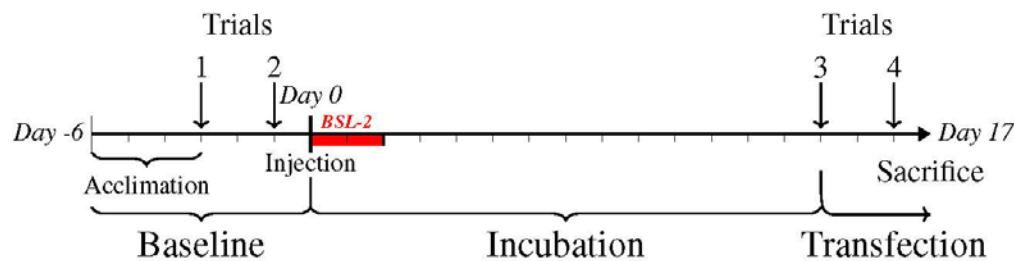

**Figure 1.** Experimental timeline with the injection of constructs on day 0. Fish were injected with a randomly assigned construct of either an aggression-related gene (MAOA or AVP) or a control fluorescent protein (EYFP). All trials were conducted double-blind to the transfected gene. Each trial had two breathing rate measurements followed by a territorial challenge.

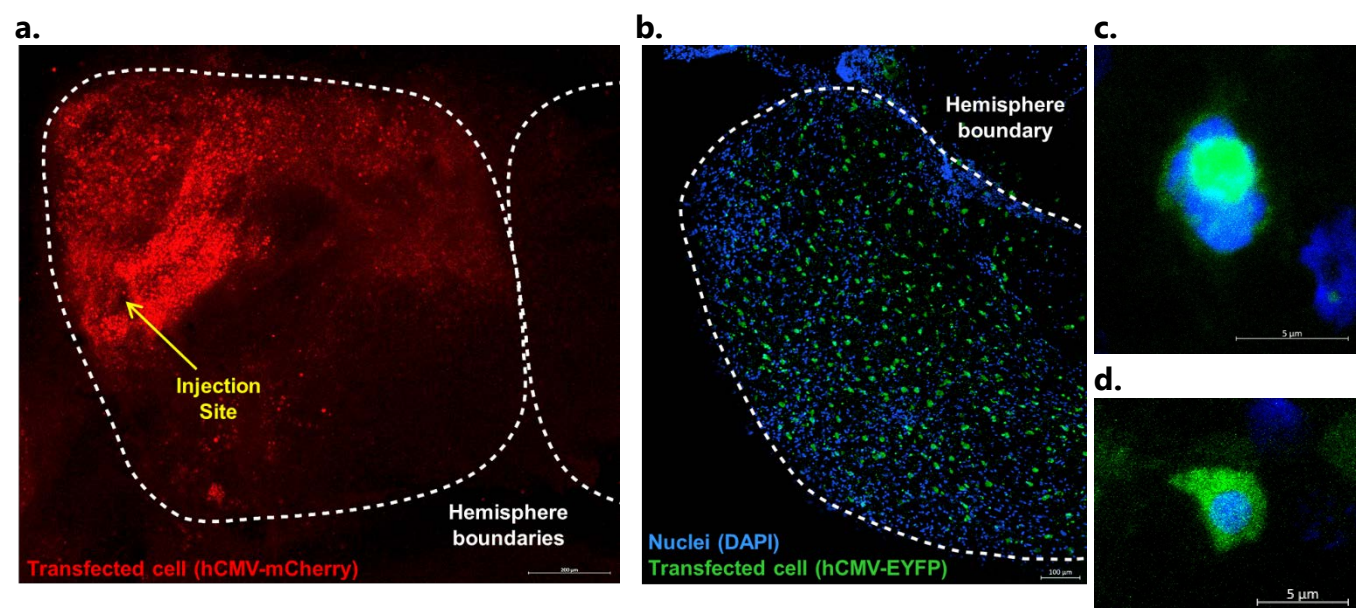

**Figure 2.** a) Single injection resulting in local expression, limited to a portion of one hemisphere of the telencephalon. b) Broad expression throughout left hemisphere of the diencephalon, typical for injections with delivery at multiple depths. c & d) Successful transfection of entire cells by the long term hCMV-EYFP construct in the lateral left diencephalon three weeks after injection.



688

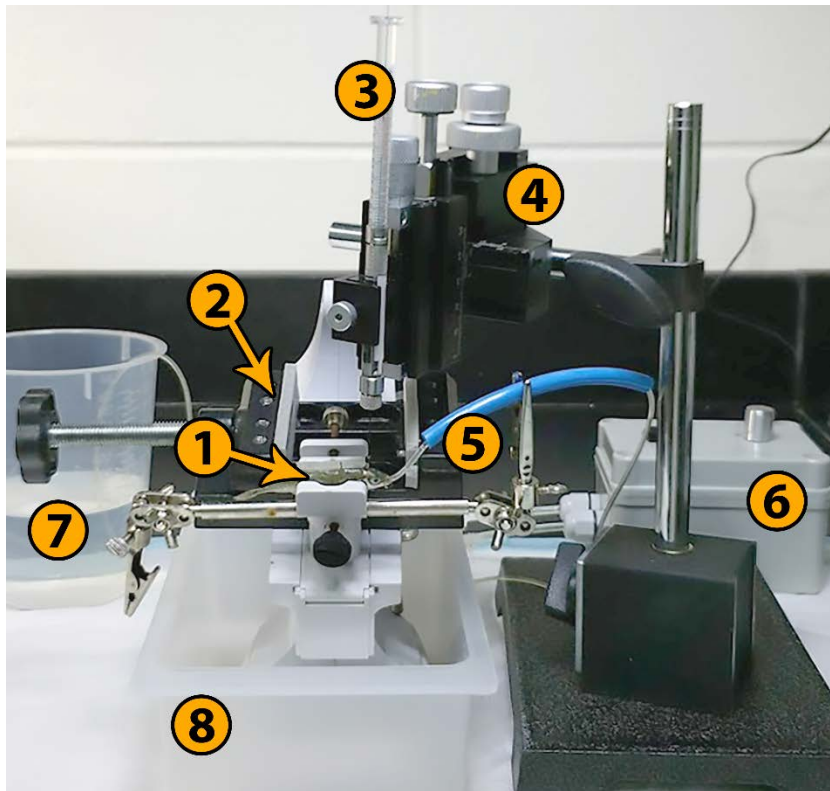

689

690 **Figure 3.** Custom-built surgical rig. 1) Threespine stickleback in padded clamp, 2) Alternative padded  
691 clamp for larger fish, 3) Neuros syringe, 5  $\mu$ L, 4) Three-axis manipulator, 5) Oral cannula and guide  
692 tube, 6) Peristaltic cannula pump, 100 mL/min, 7) Pump source reservoir, 8) Drip tray

693

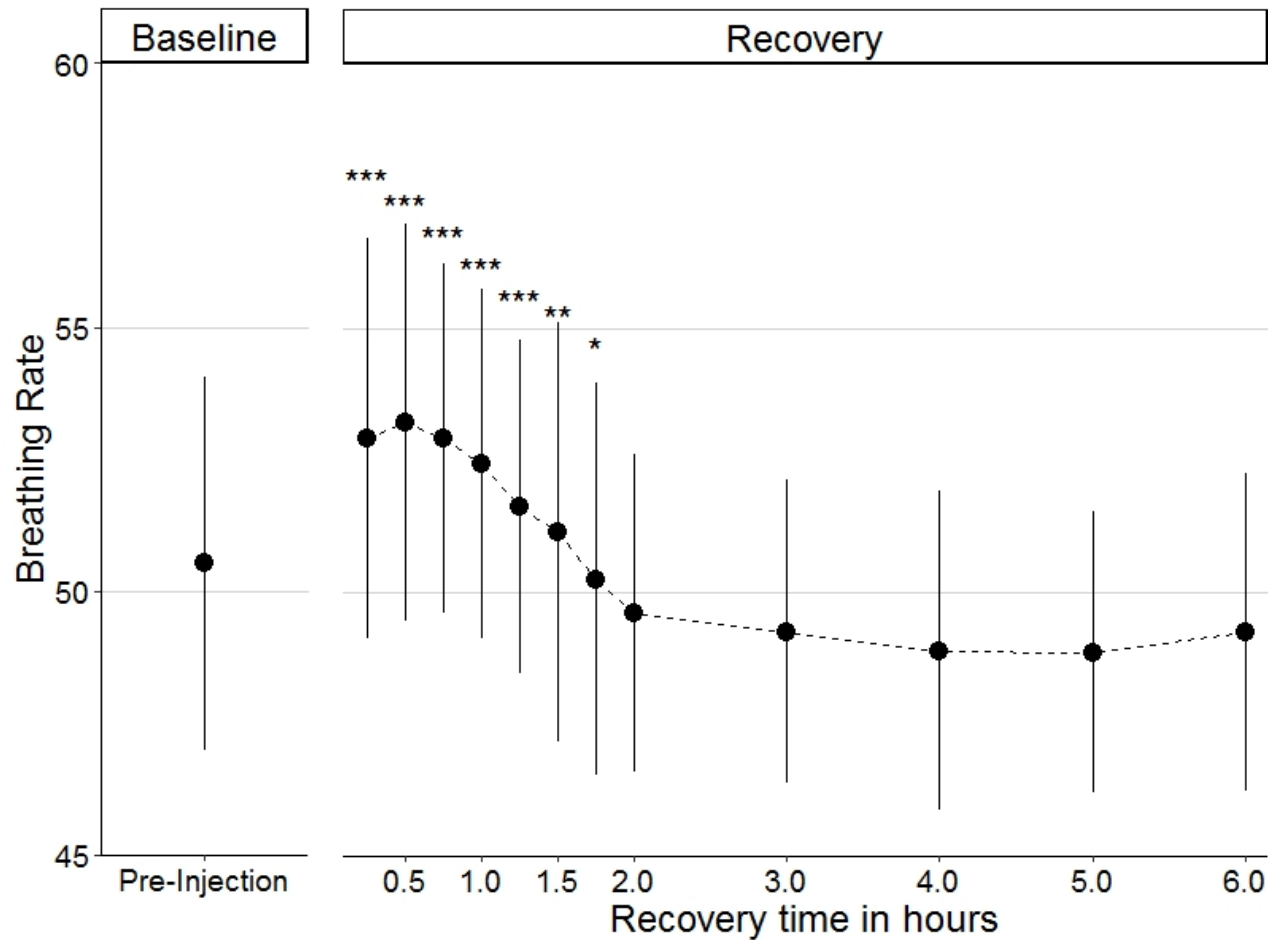

**Figure 4.** Average recovery curve of breathing rate (opercular beats per 20s) following transcranial brain injections ( $N = 62$ ). Breathing rate returned to baseline levels by 1.5 hours post-injection and remained stable following the surgery.

| <b>a.</b>    |                   |          |             |                 | <b>b.</b>             |                   |          |             |                 |
|--------------|-------------------|----------|-------------|-----------------|-----------------------|-------------------|----------|-------------|-----------------|
|              | <b>Survival %</b> | <b>N</b> | <b>Died</b> | <b>Survived</b> |                       | <b>Survival %</b> | <b>N</b> | <b>Died</b> | <b>Survived</b> |
| <i>hCMV</i>  | 86.4              | 59       | 8           | 51              | <i>AVP</i>            | 90.9              | 22       | 2           | 20              |
| <i>mCMV</i>  | 100               | 3        | 0           | 3               | <i>MAO</i>            | 91.3              | 23       | 2           | 21              |
| <i>hEF1a</i> | 100               | 6        | 0           | 6               | <i>Fluorescent</i>    | 88.2              | 68       | 8           | 60              |
|              |                   |          |             |                 | <i>Saline control</i> | 81.2              | 48       | 9           | 39              |

699 **Table 1.** a) Survival rate was not significantly affected by the choice of promoter. b) No significant  
700 difference in the survival rate for any expressed genes relative to control fish injected with saline.

701

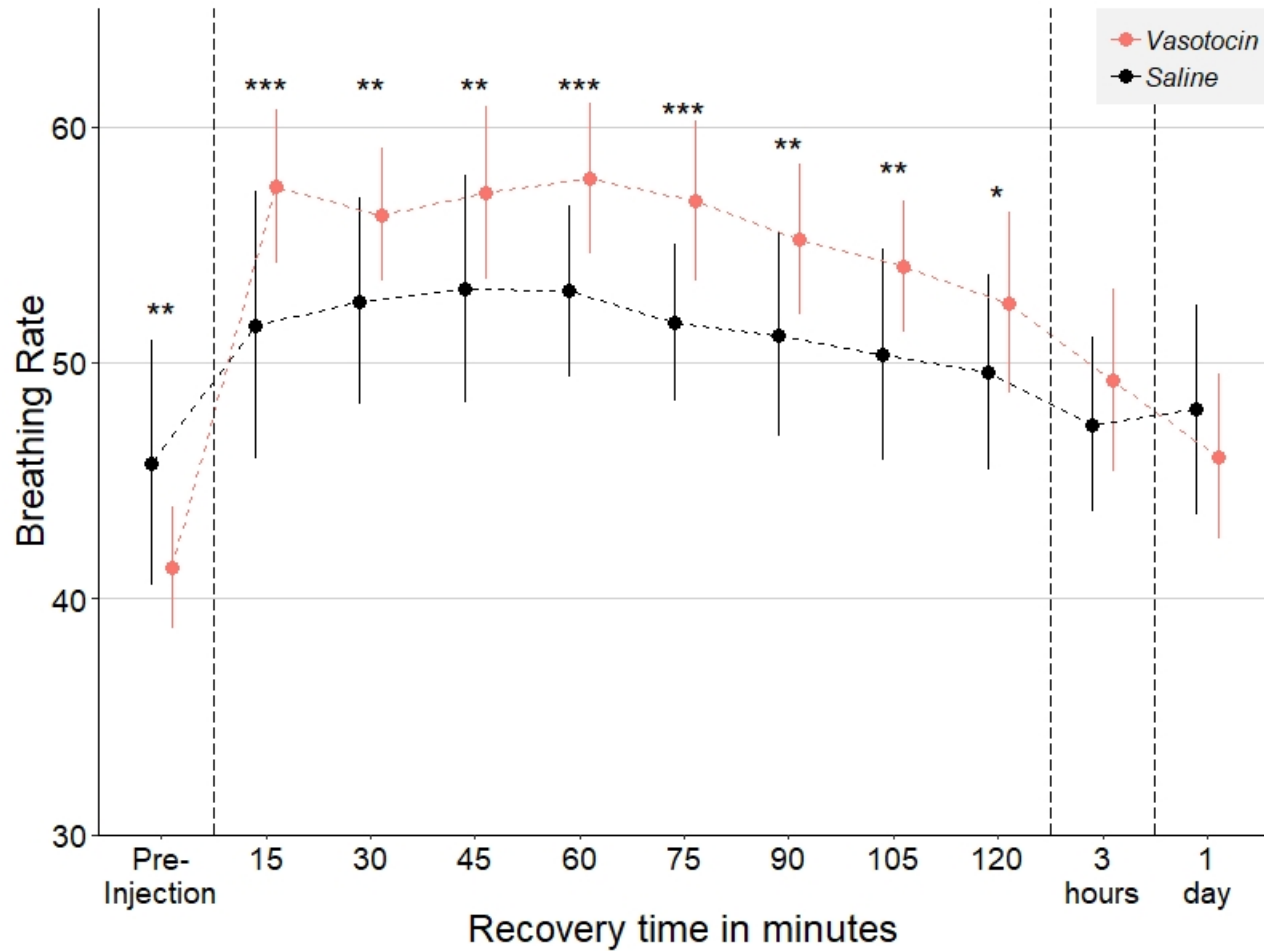

**Figure 5.** Differences in breathing rate following injection between brain injection of exogenous vasotocin ( $N = 15$ ) and saline injected controls ( $N = 39$ ). Fish injected with vasotocin had an elevated breathing rate compared to saline injected controls for more than two hours following injection.

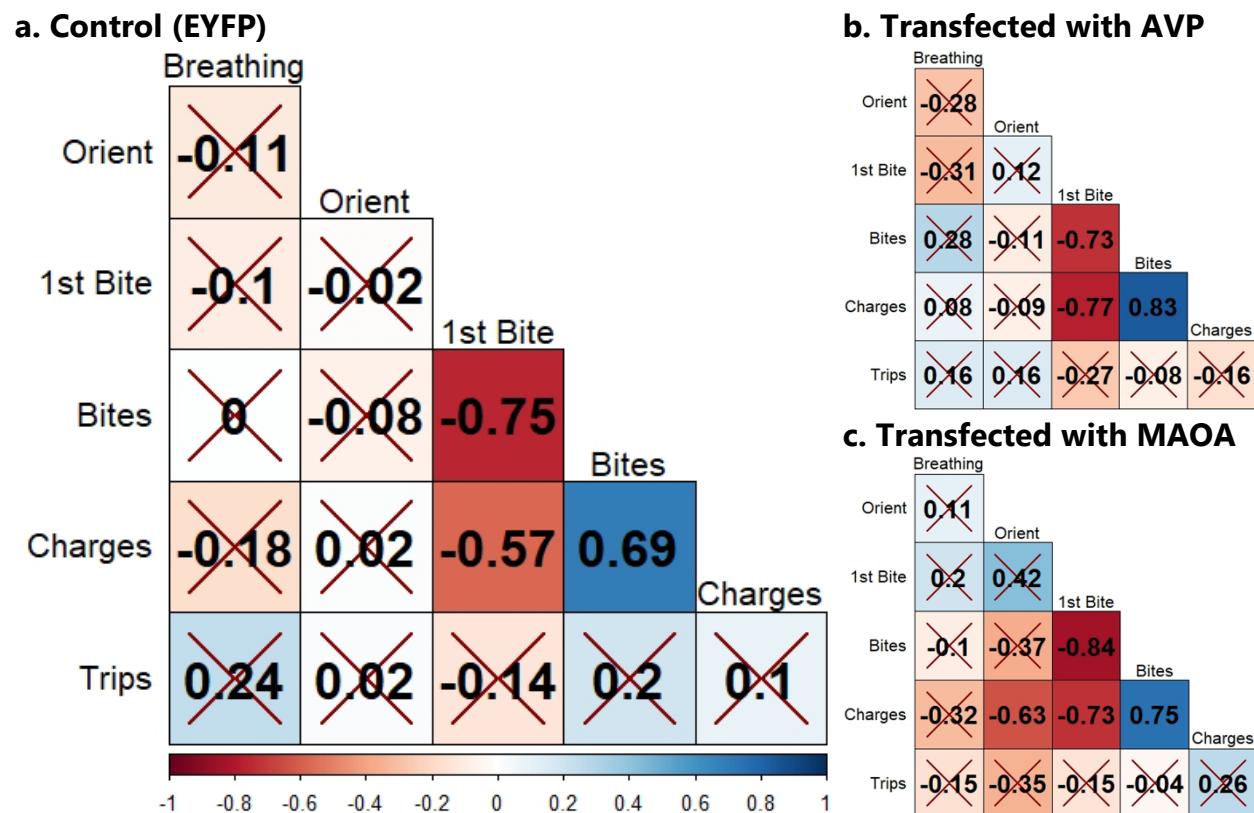

**Figure 6.** a) Correlation between all measured behaviors in control (EYFP) fish averaged across all four trials ( $N = 16$ ). Bites, charges, and time to first bite remain correlated following transfection of b) AVP ( $N = 18$ ) and c) MAOA ( $N = 20$ ). Numerical values are the strength of the correlation with crossed out boxes indicating non-significance.

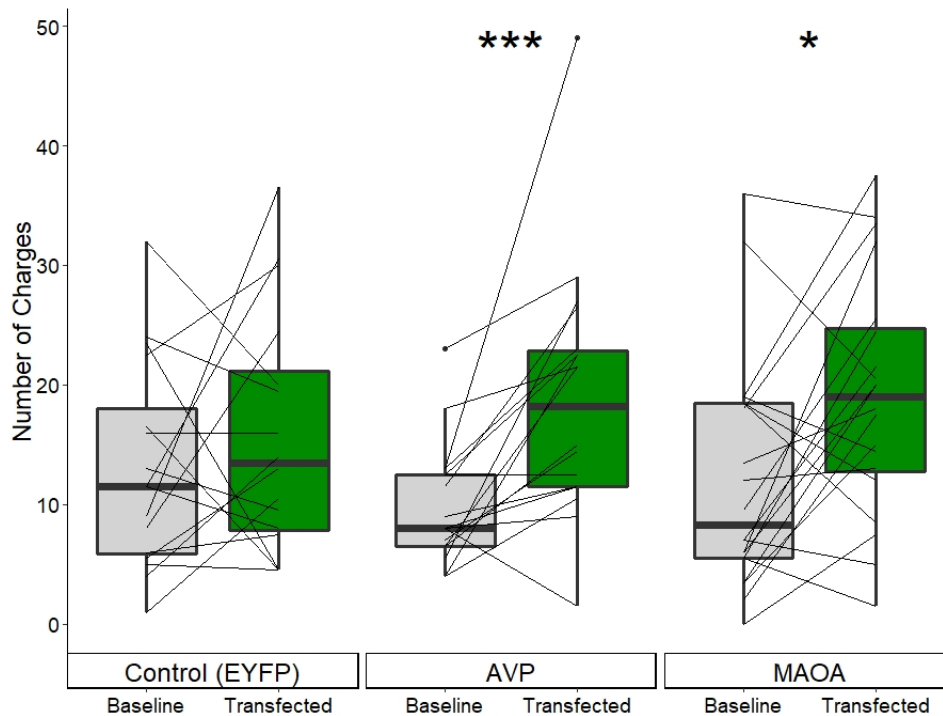

**Figure 7.** Number of charges (averaged across the two trials as each timepoint) before and after transfection for each construct. Each line represents an individual showing their change in behavior following transfection of the gene of interest. Expression of AVP resulted in a substantial and consistent increase in the number of charges; note that only one individual exhibited decreased charging behavior. Expression of MAOA resulted in an increase of large effect size in charges, although there was more variation in individual response.

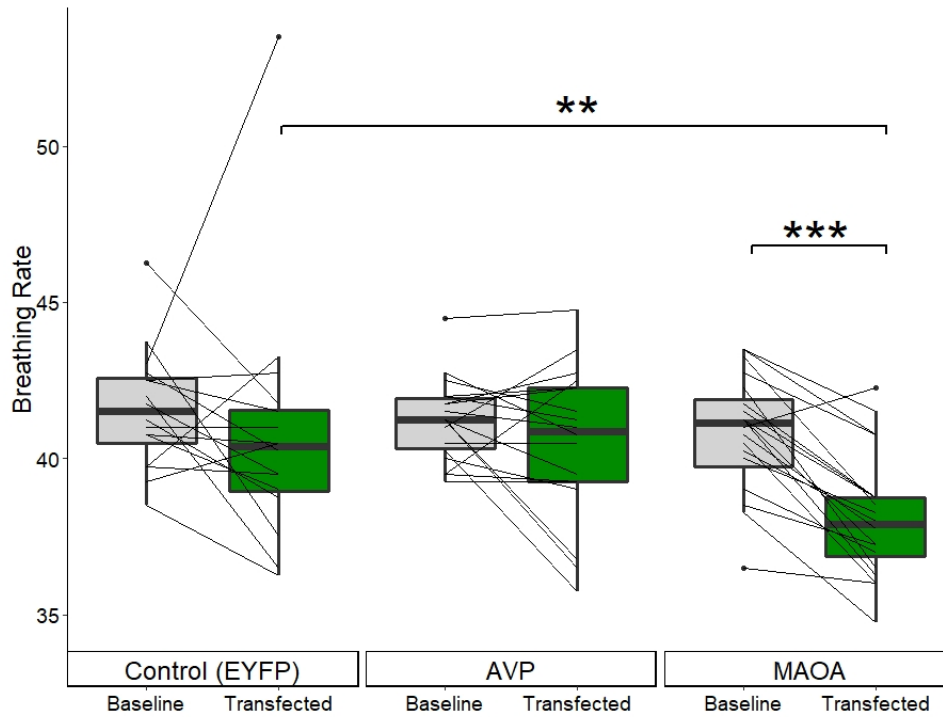

**Figure 8.** Breathing rate measured by opercular beats for the three constructs. Each line represents an individual showing their change in breathing rate, averaged across the two trials at each timepoint, before and after transfection. Only MAOA altered breathing rate; a drastic decrease compared to both baseline (within-subject comparison,  $N = 20$ ) and to the control group ( $N = 16$ ).

| Comparison                                             | Behavior<br><i>Charges</i> |      | Physiology<br><i>Breathing</i> |
|--------------------------------------------------------|----------------------------|------|--------------------------------|
|                                                        | AVP                        | MAOA | MAOA                           |
| Necessary sample size<br>(between groups, vs. control) | 277                        | 187  | 35                             |
| Actual sample size                                     | 18                         | 20   | 20                             |
| Effect size ( $r_s$ )                                  | 0.79                       | 0.53 | 0.85                           |
| Variance ( $\sigma^2$ , <i>post-expression</i> )       | 113                        | 99.9 | 3.9                            |

**Table 2.** Necessary sample sizes assume a statistical power of 0.8 and are based on the effect sizes observed in this study – i.e. 8 out of 10 experiments using samples this large will detect the difference. Viral-mediated transgenesis makes possible a repeated measures design comparing within the same individuals, increasing sensitivity. Note that AVP and MAOA are known to have a large effect on behavior, so this should be viewed a minimum for future candidate genes being screened for behavioral phenotypes.

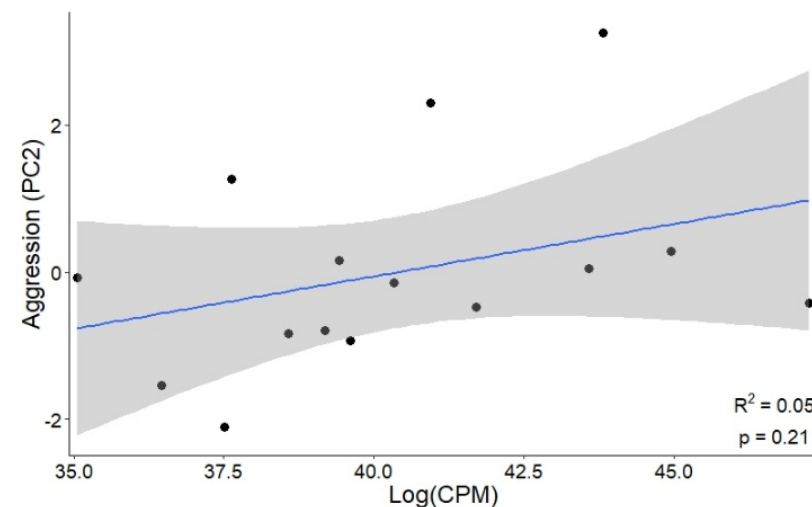

**Figure 9.** Correlation between increased aggression and increased expression of MAO.
